# Supplementary material for: New 3d–4f heterometallic clusters built from mixed glycine and iminodiacetate acid: dioctahedron {La2Ni9} and onion-like {Gd5}⊂{Ni12} with interesting magnetocaloric effect
Source: Royal Society of Chemistry journal article supplement (doi:10.1039/c3dt32752c), 2013-01-01
Supplement: c3dt32752c.pdf [file c3dt32752c.pdf]

# Supporting Information

## *New 3d-4f heterometallic clusters built from mixed glycine and iminodiacetate acid: dioctahedron {La<sub>2</sub>Ni<sub>9</sub>} and onion-like {Gd<sub>5</sub>} ⊂ {Ni<sub>12</sub>} with interesting magnetocaloric effect*

Zhong-Yi Li,<sup>a, b</sup> Jiang Zhu,<sup>c</sup> Xiao-Qun Wang,<sup>a</sup> Jun Ni,<sup>a</sup> Jian-Jun Zhang,<sup>a\*</sup> Shu-Qin Liu,<sup>a</sup> Chun-Ying Duan<sup>a, b\*</sup>

<sup>a</sup> Chemistry College, Dalian University of Technology, Dalian 116024, China

<sup>b</sup> State Key Laboratory of Fine Chemicals, Dalian University of Technology, Dalian, 116024, China

<sup>c</sup> School of Chemistry and Chemical Engineering, Liaoning Normal University, Dalian 116029, China

contents

|                                                                                                                                                                                                                                                                         |    |
|-------------------------------------------------------------------------------------------------------------------------------------------------------------------------------------------------------------------------------------------------------------------------|----|
| Table S1. Selected bond lengths (Å) and angles (°) for <b>1</b> .....                                                                                                                                                                                                   | 1  |
| Table S2. Selected bond lengths (Å) and angles (°) for <b>2</b> .....                                                                                                                                                                                                   | 2  |
| Table S3. Crystal data for <b>3-7</b> .....                                                                                                                                                                                                                             | 4  |
| Table S4. Bond-Valence Sums for selected O atoms of <b>1</b> and <b>2</b> .....                                                                                                                                                                                         | 4  |
| Figure S1. Coordination polyhedron of the La <sup>3+</sup> ions in <b>1</b> .....                                                                                                                                                                                       | 5  |
| Figure S2. The possible assembly mechanism of the [La <sub>2</sub> Ni <sub>9</sub> (μ <sub>3</sub> -OH) <sub>3</sub> (IDA) <sub>3</sub> (Gly) <sub>12</sub> ] <sup>3+</sup> cationic cluster of <b>1</b> from {La <sub>2</sub> Ni <sub>6</sub> } and {NiIDA} units..... | 5  |
| Figure S3. The coordinated environments of the Gd <sup>3+</sup> ions in <b>1</b> .....                                                                                                                                                                                  | 6  |
| Figure S4. The IR spectrum of <b>1</b> .....                                                                                                                                                                                                                            | 7  |
| Figure S5. The IR spectra of <b>2-7</b> .....                                                                                                                                                                                                                           | 7  |
| Figure S6. Powder X-ray diffraction patterns of <b>1</b> .....                                                                                                                                                                                                          | 8  |
| Figure S7. Powder X-ray diffraction patterns of <b>2-7</b> .....                                                                                                                                                                                                        | 8  |
| Figure S8. The plot of Δχ <sub>M</sub> T( <b>3-7</b> ) versus T.....                                                                                                                                                                                                    | 9  |
| Figure S9. The plot of Δχ <sub>M</sub> T( <b>4-7</b> ) versus T.....                                                                                                                                                                                                    | 9  |
| Figure S10. The plot of Δχ <sub>M</sub> T( <b>5-7</b> ) versus T.....                                                                                                                                                                                                   | 10 |
| Figure S11. The plot of Δχ <sub>M</sub> T( <b>6-7</b> ) versus T.....                                                                                                                                                                                                   | 10 |
| Figure S12. The field-dependent experimental magnetization plot at 2 K for <b>1</b> .....                                                                                                                                                                               | 11 |
| Figure S13. The field-dependent experimental magnetization plot at 2 K for <b>3</b> .....                                                                                                                                                                               | 11 |
| Figure S14. The field-dependent experimental magnetization plot at 2 K for <b>4</b> .....                                                                                                                                                                               | 12 |
| Figure S15. The field-dependent experimental magnetization plot at 2 K for <b>6</b> .....                                                                                                                                                                               | 12 |
| Figure S16. The field-dependent experimental magnetization plot at 2 K for <b>7</b> .....                                                                                                                                                                               | 13 |

**Table S1.** Selected bond lengths (Å) and angles (°) for **1**.

|                   |           |                     |            |
|-------------------|-----------|---------------------|------------|
| La(1)-O(7)        | 2.505(3)  | Ni(1)-O(3)          | 2.039(3)   |
| La(1)-O(5)        | 2.758(3)  | Ni(1)-O(2)#2        | 2.049(4)   |
| La(1)-O(3)        | 2.772(3)  | Ni(1)-N(1)          | 2.057(4)   |
| La(1)-O(1)        | 2.808(3)  | Ni(1)-O(6)          | 2.069(3)   |
| La(2)-O(9)        | 2.501(7)  | Ni(2)-O(7)          | 1.979(4)   |
| La(2)-O(8)        | 2.522(8)  | Ni(2)-O(5)          | 2.042(3)   |
| Ni(1)-N(2)        | 2.035(5)  | Ni(2)-N(3)          | 2.078(5)   |
| Ni(1)-O(1)        | 2.038(3)  | Ni(2)-O(4)#1        | 2.054(3)   |
| Ni(2)-O(5)-La(1)  | 99.22(12) | O(1)-La(1)-O(1)#2   | 62.28(11)  |
| O(7)-Ni(2)-O(4)#1 | 98.98(13) | O(5)-La(1)-O(3)     | 61.69(10)  |
| O(5)-Ni(2)-O(5)#3 | 94.01(18) | O(3)-La(1)-O(1)#2   | 59.63(9)   |
| O(1)-Ni(1)-O(3)   | 93.04(13) | O(2)#2-Ni(1)-O(6)   | 179.80(16) |
| O(4)#1-Ni(2)-N(3) | 92.69(17) | O(5)#2-La(1)-O(3)#1 | 176.06(9)  |
| O(1)-Ni(1)-O(6)   | 91.21(14) | N(2)-Ni(1)-O(1)     | 175.23(17) |
| N(2)-Ni(1)-O(2)#2 | 90.19(19) | O(7)-La(1)-O(1)#2   | 175.03(12) |
| N(1)-Ni(1)-O(6)   | 90.14(17) | O(7)#1-La(1)-O(1)   | 175.03(11) |
| O(3)-Ni(1)-O(2)#2 | 90.02(15) | O(3)-Ni(1)-N(1)     | 174.92(16) |
| N(2)-Ni(1)-O(6)   | 90.01(18) | O(5)#3-Ni(2)-O(4)#1 | 173.56(14) |
| O(3)-Ni(1)-O(6)   | 89.97(13) | O(7)-Ni(2)-N(3)     | 163.9(2)   |
| O(2)#2-Ni(1)-N(1) | 89.86(18) | O(9)#4-La(2)-O(8)   | 143.8(2)   |
| O(5)-Ni(2)-O(4)#1 | 89.44(13) | O(9)#3-La(2)-O(9)#4 | 132.25(13) |
| O(9)-La(2)-O(9)#4 | 89.0(3)   | O(7)#1-La(1)-O(3)   | 120.92(11) |
| O(1)-Ni(1)-O(2)#2 | 88.59(15) | O(8)#4-La(2)-O(8)   | 120.000(2) |
| O(7)-Ni(2)-O(5)   | 86.67(12) | O(7)-La(1)-O(1)#1   | 119.23(10) |
| O(5)-Ni(2)-N(3)   | 82.39(15) | O(5)-La(1)-O(1)#1   | 118.97(10) |
| N(2)-Ni(1)-O(3)   | 82.34(16) | O(7)#1-La(1)-O(5)   | 118.49(10) |
| O(1)-Ni(1)-N(1)   | 81.88(16) | O(5)-La(1)-O(5)#2   | 117.14(4)  |
| O(9)#3-La(2)-O(9) | 71.9(4)   | O(7)-La(1)-O(3)     | 116.36(11) |
| O(9)-La(2)-O(8)#4 | 69.9(2)   | O(3)#2-La(1)-O(3)   | 115.04(5)  |
| O(5)-La(1)-O(3)#1 | 65.96(10) | O(7)-La(1)-O(1)     | 113.74(11) |
| O(7)-La(1)-O(7)#1 | 65.01(12) | O(5)-La(1)-O(1)#2   | 112.02(9)  |
| O(7)-La(1)-O(5)#1 | 64.81(11) | Ni(2)-O(7)-La(1)    | 109.97(12) |
| O(3)-La(1)-O(1)   | 64.04(9)  | La(1)#3-O(7)-La(1)  | 103.29(15) |
| O(5)-La(1)-O(1)   | 63.40(10) | N(2)-Ni(1)-N(1)     | 102.73(19) |
| O(7)-La(1)-O(5)   | 63.02(11) | Ni(1)-O(3)-La(1)    | 102.01(12) |
| O(9)-La(2)-O(8)   | 62.5(2)   | Ni(1)-O(1)-La(1)    | 100.86(12) |

Symmetry codes: #1 -y+3, x-y+1, z; #2 -x+y+2, -x+3, z; #3 x, y, -z+3/2; #4 -y+2, x-y, z.

**Table S2.** Selected bond lengths (Å) and angles (°) for **2**.

|                   |          |                   |            |                   |           |
|-------------------|----------|-------------------|------------|-------------------|-----------|
| Gd(1)-O(1T)       | 2.329(6) | Gd(5)-O(1T)       | 2.416(6)   | Ni(6)-O(23)       | 2.048(10) |
| Gd(1)-O(2T)       | 2.380(6) | Gd(5)-O(37)       | 2.418(6)   | Ni(6)-O(26)       | 2.142(8)  |
| Gd(1)-O(3T)       | 2.393(5) | Gd(5)-O(41)       | 2.439(6)   | Ni(6)-O(48)       | 2.188(10) |
| Gd(1)-O(47)       | 2.421(6) | Gd(5)-O(6T)       | 2.460(6)   | Ni(7)-O(3T)       | 2.032(6)  |
| Gd(1)-O(23)       | 2.451(7) | Gd(5)-O(9T)       | 2.462(5)   | Ni(7)-O(20)       | 2.036(7)  |
| Gd(1)-O(25)       | 2.472(7) | Gd(5)-O(2T)       | 2.492(6)   | Ni(7)-O(27)       | 2.037(6)  |
| Gd(1)-O(21)       | 2.562(8) | Ni(1)-O(3)        | 2.019(8)   | Ni(7)-O(25)       | 2.046(7)  |
| Gd(1)-O(17)       | 2.588(8) | Ni(1)-O(1)        | 2.024(7)   | Ni(7)-O(32)       | 2.053(6)  |
| Gd(1)-O(19)       | 2.593(8) | Ni(1)-O(6)        | 2.058(9)   | Ni(7)-N(13)       | 2.109(7)  |
| Gd(2)-O(4T)       | 2.359(5) | Ni(1)-N(2)        | 2.069(13)  | Ni(8)-O(29)       | 2.042(6)  |
| Gd(2)-O(6T)       | 2.388(6) | Ni(1)-N(1)        | 2.086(11)  | Ni(8)-O(8T)       | 2.044(5)  |
| Gd(2)-O(5T)       | 2.416(6) | Ni(1)-O(50)       | 2.209(11)  | Ni(8)-O(12)       | 2.044(7)  |
| Gd(2)-O(33)       | 2.436(7) | Ni(2)-N(4)        | 2.012(9)   | Ni(8)-O(31)       | 2.055(6)  |
| Gd(2)-O(39)       | 2.460(6) | Ni(2)-O(7)        | 2.016(6)   | Ni(8)-O(36)       | 2.060(7)  |
| Gd(2)-O(5)        | 2.502(6) | Ni(2)-O(5)        | 2.025(7)   | Ni(8)-N(14)       | 2.112(8)  |
| Gd(2)-O(7)        | 2.538(6) | Ni(2)-N(3)        | 2.085(8)   | Ni(9)-O(5T)       | 2.031(6)  |
| Gd(2)-O(3)        | 2.548(7) | Ni(2)-O(40)       | 2.173(8)   | Ni(9)-O(4)        | 2.033(8)  |
| Gd(2)-O(1)        | 2.593(7) | Ni(2)-O(34)       | 2.216(8)   | Ni(9)-O(35)       | 2.051(6)  |
| Gd(3)-O(7T)       | 2.335(5) | Ni(3)-O(11)       | 2.020(6)   | Ni(9)-O(33)       | 2.061(7)  |
| Gd(3)-O(9T)       | 2.398(6) | Ni(3)-O(9)        | 2.029(6)   | Ni(9)-O(28)       | 2.074(7)  |
| Gd(3)-O(8T)       | 2.406(6) | Ni(3)-N(6)        | 2.054(9)   | Ni(9)-N(15)       | 2.100(9)  |
| Gd(3)-O(43)       | 2.442(6) | Ni(3)-O(14)       | 2.056(7)   | Ni(10)-O(6T)      | 2.029(6)  |
| Gd(3)-O(29)       | 2.461(6) | Ni(3)-N(5)        | 2.076(8)   | Ni(10)-O(37)      | 2.038(6)  |
| Gd(3)-O(13)       | 2.488(6) | Ni(3)-O(49)       | 2.100(7)   | Ni(10)-O(2)       | 2.046(8)  |
| Gd(3)-O(11)       | 2.548(6) | Ni(4)-O(15)       | 2.019(6)   | Ni(10)-O(46)      | 2.047(8)  |
| Gd(3)-O(15)       | 2.565(6) | Ni(4)-O(13)       | 2.020(6)   | Ni(10)-O(39)      | 2.065(7)  |
| Gd(3)-O(9)        | 2.589(6) | Ni(4)-N(8)        | 2.022(9)   | Ni(10)-N(16)      | 2.087(9)  |
| Gd(4)-O(4T)       | 2.402(5) | Ni(4)-N(7)        | 2.067(8)   | Ni(11)-O(41)      | 2.036(6)  |
| Gd(4)-O(7T)       | 2.406(5) | Ni(4)-O(30)       | 2.121(7)   | Ni(11)-O(9T)      | 2.042(6)  |
| Gd(4)-O(1T)       | 2.420(5) | Ni(4)-O(44)       | 2.143(7)   | Ni(11)-O(10)      | 2.055(6)  |
| Gd(4)-O(31)       | 2.427(5) | Ni(5)-O(17)       | 2.018(9)   | Ni(11)-O(43)      | 2.075(6)  |
| Gd(4)-O(35)       | 2.439(6) | Ni(5)-O(24)       | 2.022(14)  | Ni(11)-N(17)      | 2.103(8)  |
| Gd(4)-O(27)       | 2.453(6) | Ni(5)-O(19)       | 2.054(8)   | Ni(11)-O(38)      | 2.107(6)  |
| Gd(4)-O(8T)       | 2.465(6) | Ni(5)-N(10)       | 2.055(14)  | Ni(12)-O(18)      | 2.020(9)  |
| Gd(4)-O(5T)       | 2.474(5) | Ni(5)-N(9)        | 2.063(11)  | Ni(12)-O(2T)      | 2.030(6)  |
| Gd(4)-O(3T)       | 2.483(6) | Ni(5)-O(51)       | 2.127(11)  | Ni(12)-O(45)      | 2.059(7)  |
| Gd(5)-O(4T)       | 2.382(5) | Ni(6)-O(21)       | 2.007(9)   | Ni(12)-O(47)      | 2.060(8)  |
| Gd(5)-O(7T)       | 2.392(5) | Ni(6)-N(11)       | 2.011(14)  | Ni(12)-O(42)      | 2.072(7)  |
| Gd(5)-O(45)       | 2.415(6) | Ni(6)-N(12)       | 2.027(12)  | Ni(12)-N(18)      | 2.085(9)  |
| O(3T)-Gd(1)-O(47) | 155.8(2) | O(8T)-Gd(3)-O(43) | 156.72(19) | O(4T)-Gd(5)-O(45) | 138.1(2)  |
| O(1T)-Gd(1)-O(23) | 141.9(3) | O(9T)-Gd(3)-O(29) | 154.38(19) | O(7T)-Gd(5)-O(45) | 140.1(2)  |
| O(2T)-Gd(1)-O(23) | 132.1(2) | O(43)-Gd(3)-O(29) | 127.52(19) | O(7T)-Gd(5)-O(37) | 134.0(2)  |

|                   |          |                    |            |                    |          |
|-------------------|----------|--------------------|------------|--------------------|----------|
| O(3T)-Gd(1)-O(23) | 130.1(2) | O(7T)-Gd(3)-O(13)  | 141.4(2)   | O(1T)-Gd(5)-O(37)  | 139.9(2) |
| O(2T)-Gd(1)-O(25) | 155.2(2) | O(9T)-Gd(3)-O(13)  | 132.0(2)   | O(4T)-Gd(5)-O(41)  | 140.4(2) |
| O(47)-Gd(1)-O(25) | 128.5(2) | O(8T)-Gd(3)-O(13)  | 130.6(2)   | O(1T)-Gd(5)-O(41)  | 137.8(2) |
| O(2T)-Gd(1)-O(21) | 117.9(2) | O(7T)-Gd(3)-O(11)  | 139.8(2)   | O(7T)-Gd(5)-O(6T)  | 133.5(2) |
| O(3T)-Gd(1)-O(21) | 117.2(2) | O(9T)-Gd(3)-O(11)  | 115.7(2)   | O(41)-Gd(5)-O(6T)  | 134.8(2) |
| O(1T)-Gd(1)-O(17) | 138.5(2) | O(43)-Gd(3)-O(11)  | 127.2(2)   | O(45)-Gd(5)-O(9T)  | 135.1(2) |
| O(3T)-Gd(1)-O(17) | 114.5(3) | O(9T)-Gd(3)-O(15)  | 114.7(2)   | O(1T)-Gd(5)-O(9T)  | 133.9(2) |
| O(25)-Gd(1)-O(17) | 129.2(3) | O(8T)-Gd(3)-O(15)  | 117.8(2)   | O(6T)-Gd(5)-O(9T)  | 120.1(2) |
| O(21)-Gd(1)-O(17) | 127.4(3) | O(11)-Gd(3)-O(15)  | 128.6(2)   | O(4T)-Gd(5)-O(2T)  | 131.8(2) |
| O(1T)-Gd(1)-O(19) | 138.5(3) | O(7T)-Gd(3)-O(9)   | 138.45(18) | O(37)-Gd(5)-O(2T)  | 136.7(2) |
| O(2T)-Gd(1)-O(19) | 112.5(3) | O(8T)-Gd(3)-O(9)   | 114.3(2)   | O(6T)-Gd(5)-O(2T)  | 119.7(2) |
| O(47)-Gd(1)-O(19) | 129.2(3) | O(29)-Gd(3)-O(9)   | 131.0(2)   | O(9T)-Gd(5)-O(2T)  | 120.1(2) |
| O(21)-Gd(1)-O(19) | 129.0(3) | O(15)-Gd(3)-O(9)   | 127.6(2)   | O(1)-Ni(1)-N(2)    | 166.2(4) |
| O(6T)-Gd(2)-O(33) | 155.2(2) | O(4T)-Gd(4)-O(31)  | 141.31(18) | O(3)-Ni(1)-N(1)    | 166.6(4) |
| O(5T)-Gd(2)-O(39) | 156.1(2) | O(1T)-Gd(4)-O(31)  | 137.7(2)   | N(2)-Ni(1)-N(1)    | 110.8(5) |
| O(33)-Gd(2)-O(39) | 128.0(2) | O(7T)-Gd(4)-O(35)  | 136.83(19) | O(6)-Ni(1)-O(50)   | 175.7(5) |
| O(4T)-Gd(2)-O(5)  | 143.5(2) | O(1T)-Gd(4)-O(35)  | 141.02(19) | N(4)-Ni(2)-O(5)    | 174.0(3) |
| O(6T)-Gd(2)-O(5)  | 131.4(2) | O(4T)-Gd(4)-O(27)  | 137.51(19) | N(4)-Ni(2)-N(3)    | 102.0(4) |
| O(5T)-Gd(2)-O(5)  | 130.7(2) | O(7T)-Gd(4)-O(27)  | 141.07(19) | O(7)-Ni(2)-N(3)    | 175.0(4) |
| O(6T)-Gd(2)-O(7)  | 116.7(2) | O(1T)-Gd(4)-O(8T)  | 133.7(2)   | O(40)-Ni(2)-O(34)  | 171.1(3) |
| O(5T)-Gd(2)-O(7)  | 118.2(2) | O(27)-Gd(4)-O(8T)  | 135.19(19) | O(9)-Ni(3)-N(6)    | 167.7(3) |
| O(4T)-Gd(2)-O(3)  | 138.0(2) | O(7T)-Gd(4)-O(5T)  | 132.49(18) | O(11)-Ni(3)-N(5)   | 167.5(3) |
| O(6T)-Gd(2)-O(3)  | 112.1(3) | O(31)-Gd(4)-O(5T)  | 134.7(2)   | N(6)-Ni(3)-N(5)    | 108.9(4) |
| O(39)-Gd(2)-O(3)  | 127.6(2) | O(8T)-Gd(4)-O(5T)  | 120.17(19) | O(14)-Ni(3)-O(49)  | 177.8(3) |
| O(7)-Gd(2)-O(3)   | 130.2(3) | O(4T)-Gd(4)-O(3T)  | 133.43(18) | O(13)-Ni(4)-N(8)   | 176.6(3) |
| O(4T)-Gd(2)-O(1)  | 139.4(2) | O(35)-Gd(4)-O(3T)  | 134.9(2)   | O(15)-Ni(4)-N(7)   | 175.0(3) |
| O(5T)-Gd(2)-O(1)  | 116.0(2) | O(8T)-Gd(4)-O(3T)  | 120.2(2)   | N(8)-Ni(4)-O(44)   | 91.0(3)  |
| O(33)-Gd(2)-O(1)  | 129.3(2) | O(5T)-Gd(4)-O(3T)  | 119.6(2)   | O(30)-Ni(4)-O(44)  | 172.5(2) |
| O(17)-Ni(5)-N(10) | 167.7(5) | O(8T)-Ni(8)-O(12)  | 100.3(3)   | O(37)-Ni(10)-O(2)  | 176.8(3) |
| O(19)-Ni(5)-N(9)  | 167.4(4) | O(12)-Ni(8)-O(31)  | 174.5(3)   | O(6T)-Ni(10)-O(46) | 94.9(3)  |
| N(10)-Ni(5)-N(9)  | 109.4(5) | O(29)-Ni(8)-O(36)  | 177.0(3)   | O(46)-Ni(10)-O(39) | 178.5(3) |
| O(24)-Ni(5)-O(51) | 179.5(5) | O(8T)-Ni(8)-N(14)  | 159.5(3)   | O(6T)-Ni(10)-N(16) | 160.6(3) |
| O(21)-Ni(6)-N(12) | 173.7(5) | O(36)-Ni(8)-N(14)  | 101.7(3)   | O(41)-Ni(11)-O(10) | 176.0(3) |
| N(11)-Ni(6)-N(12) | 101.0(5) | O(4)-Ni(9)-O(35)   | 175.7(3)   | O(9T)-Ni(11)-N(17) | 158.7(3) |
| N(11)-Ni(6)-O(23) | 176.2(4) | O(33)-Ni(9)-O(28)  | 177.5(3)   | O(43)-Ni(11)-O(38) | 179.1(3) |
| O(26)-Ni(6)-O(48) | 169.0(3) | O(5T)-Ni(9)-N(15)  | 159.3(3)   | N(17)-Ni(11)-O(38) | 100.1(3) |
| O(20)-Ni(7)-O(27) | 174.0(3) | O(28)-Ni(9)-N(15)  | 101.7(3)   | O(18)-Ni(12)-O(45) | 174.1(3) |
| O(25)-Ni(7)-O(32) | 178.7(3) | O(42)-Ni(12)-N(18) | 102.5(3)   | O(47)-Ni(12)-O(42) | 176.0(3) |
| O(3T)-Ni(7)-N(13) | 159.9(3) | O(2T)-Ni(12)-N(18) | 159.3(4)   | Ni(11)-O(9T)-Gd(5) | 101.6(2) |
| Gd(1)-O(1T)-Gd(5) | 115.3(2) | Ni(1)-O(1)-Gd(2)   | 104.2(3)   | Ni(3)-O(9)-Gd(3)   | 103.8(2) |
| Gd(1)-O(1T)-Gd(4) | 114.0(2) | Ni(12)-O(2T)-Gd(1) | 104.2(3)   | Ni(3)-O(11)-Gd(3)  | 105.5(2) |
| Gd(5)-O(1T)-Gd(4) | 91.3(2)  | Ni(12)-O(2T)-Gd(5) | 100.3(2)   | Ni(4)-O(13)-Gd(3)  | 98.7(3)  |
| Gd(1)-O(2T)-Gd(5) | 110.7(2) | Ni(7)-O(3T)-Gd(1)  | 104.2(2)   | Ni(4)-O(15)-Gd(3)  | 96.3(3)  |
| Gd(1)-O(3T)-Gd(4) | 109.5(2) | Ni(7)-O(3T)-Gd(4)  | 101.5(2)   | Ni(5)-O(17)-Gd(1)  | 104.7(3) |

|                    |          |                    |          |                    |          |
|--------------------|----------|--------------------|----------|--------------------|----------|
| Gd(2)-O(4T)-Gd(5)  | 114.1(2) | Ni(1)-O(3)-Gd(2)   | 106.0(3) | Ni(5)-O(19)-Gd(1)  | 103.5(4) |
| Gd(2)-O(4T)-Gd(4)  | 115.0(2) | Ni(9)-O(5T)-Gd(2)  | 103.4(2) | Ni(6)-O(21)-Gd(1)  | 97.7(4)  |
| Gd(5)-O(4T)-Gd(4)  | 92.5(2)  | Ni(9)-O(5T)-Gd(4)  | 100.5(2) | Ni(6)-O(23)-Gd(1)  | 100.1(3) |
| Gd(2)-O(5T)-Gd(4)  | 110.4(2) | Ni(2)-O(5)-Gd(2)   | 98.1(2)  | Ni(7)-O(25)-Gd(1)  | 101.1(3) |
| Gd(2)-O(6T)-Gd(5)  | 110.2(2) | Ni(10)-O(6T)-Gd(2) | 104.1(3) | Ni(7)-O(27)-Gd(4)  | 102.4(2) |
| Gd(3)-O(7T)-Gd(5)  | 114.6(2) | Ni(10)-O(6T)-Gd(5) | 101.6(3) | Ni(8)-O(29)-Gd(3)  | 102.1(2) |
| Gd(3)-O(7T)-Gd(4)  | 114.7(2) | Ni(2)-O(7)-Gd(2)   | 97.2(2)  | Ni(8)-O(31)-Gd(4)  | 102.5(2) |
| Gd(5)-O(7T)-Gd(4)  | 92.2(2)  | Ni(8)-O(8T)-Gd(3)  | 103.9(2) | Ni(9)-O(33)-Gd(2)  | 101.8(3) |
| Gd(3)-O(8T)-Gd(4)  | 110.0(2) | Ni(8)-O(8T)-Gd(4)  | 101.5(2) | Ni(9)-O(35)-Gd(4)  | 101.1(3) |
| Gd(3)-O(9T)-Gd(5)  | 109.9(2) | Ni(11)-O(9T)-Gd(3) | 104.0(2) | Ni(10)-O(37)-Gd(5) | 102.8(2) |
| Ni(12)-O(47)-Gd(1) | 101.8(3) | Ni(12)-O(45)-Gd(5) | 102.0(3) | Ni(10)-O(39)-Gd(2) | 100.6(3) |
| Ni(11)-O(43)-Gd(3) | 101.5(2) | Ni(11)-O(41)-Gd(5) | 102.5(2) |                    |          |

**Table S3.** Crystal data for **3-7**.

|                                      | <b>3</b>                                                                                                             | <b>4</b>                                                                                                             | <b>5</b>                                                                                                             | <b>6</b>                                                                                                             | <b>7</b>                                                                                                            |
|--------------------------------------|----------------------------------------------------------------------------------------------------------------------|----------------------------------------------------------------------------------------------------------------------|----------------------------------------------------------------------------------------------------------------------|----------------------------------------------------------------------------------------------------------------------|---------------------------------------------------------------------------------------------------------------------|
| Formula                              | C <sub>48</sub> H <sub>115</sub> Cl <sub>6</sub> Nd <sub>5</sub> N <sub>18</sub><br>Ni <sub>12</sub> O <sub>95</sub> | C <sub>48</sub> H <sub>115</sub> Cl <sub>6</sub> Sm <sub>5</sub> N <sub>18</sub><br>Ni <sub>12</sub> O <sub>95</sub> | C <sub>48</sub> H <sub>115</sub> Cl <sub>6</sub> Tb <sub>5</sub> N <sub>18</sub><br>Ni <sub>12</sub> O <sub>95</sub> | C <sub>48</sub> H <sub>115</sub> Cl <sub>6</sub> Dy <sub>5</sub> N <sub>18</sub><br>Ni <sub>12</sub> O <sub>95</sub> | C <sub>48</sub> H <sub>115</sub> Cl <sub>6</sub> Y <sub>5</sub> N <sub>18</sub><br>Ni <sub>12</sub> O <sub>95</sub> |
| Mr.                                  | 4102.74                                                                                                              | 4133.33                                                                                                              | 4176.15                                                                                                              | 4281.10                                                                                                              | 3828.06                                                                                                             |
| Cryst. system                        | Orthorhombic                                                                                                         | Orthorhombic                                                                                                         | Orthorhombic                                                                                                         | Orthorhombic                                                                                                         | Orthorhombic                                                                                                        |
| Space group                          | P2 <sub>1</sub> 2 <sub>1</sub> 2 <sub>1</sub>                                                                        | P2 <sub>1</sub> 2 <sub>1</sub> 2 <sub>1</sub>                                                                       |
| <i>a</i> / Å                         | 17.1835(7)                                                                                                           | 17.104(4)                                                                                                            | 17.61(3)                                                                                                             | 17.070(6)                                                                                                            | 17.213(4)                                                                                                           |
| <i>b</i> / Å                         | 26.6609(10)                                                                                                          | 26.684(6)                                                                                                            | 27.66(4)                                                                                                             | 26.704(9)                                                                                                            | 26.471(6)                                                                                                           |
| <i>c</i> / Å                         | 26.8884(10)                                                                                                          | 26.684(6)                                                                                                            | 27.66(4)                                                                                                             | 26.704(9)                                                                                                            | 26.471(6)                                                                                                           |
| <i>α</i> / °                         | 90                                                                                                                   | 90                                                                                                                   | 90                                                                                                                   | 90                                                                                                                   | 90                                                                                                                  |
| <i>β</i> / °                         | 90                                                                                                                   | 90                                                                                                                   | 90                                                                                                                   | 90                                                                                                                   | 90                                                                                                                  |
| <i>γ</i> / °                         | 90                                                                                                                   | 90                                                                                                                   | 90                                                                                                                   | 90                                                                                                                   | 90                                                                                                                  |
| <i>V</i> (Å <sup>3</sup> )/ <i>Z</i> | 12318.3(8)/4                                                                                                         | 12178(4)/4                                                                                                           | 13470(4)/4                                                                                                           | 12172(7)/4                                                                                                           | 12061(4)/4                                                                                                          |

**Table S4.** Bond-Valence Sums for selected O atoms of **1** and **2**.<sup>a</sup>

| compound | atom | OH <sup>-</sup> | atom | OH <sup>-</sup> |
|----------|------|-----------------|------|-----------------|
| <b>1</b> | O7   | 1.18            |      |                 |
| <b>2</b> | O1T  | 1.15            | O6T  | 1.05            |
|          | O2T  | 1.04            | O7T  | 1.18            |
|          | O3T  | 1.03            | O8T  | 1.02            |
|          | O4T  | 1.16            | O9T  | 1.03            |
|          | O5T  | 1.02            |      |                 |

<sup>a</sup> Bond-Valence Sum (BVS) calculations confirm that the μ<sub>3</sub>-O atoms are μ<sub>3</sub>-OH<sup>-</sup> groups.<sup>1,2</sup>

References:

- 1 C. Papatriantafyllopoulou, W. Wernsdorfer, K. A. Abboud and G. Christou, *Inorg. Chem.*, 2011, **50**, 421 and references therein.
- 2 A. Saha, M. Thompson, K. A. Abboud, W. Wernsdorfer and G. Christou, *Inorg. Chem.*, 2011, **50**, 10476.

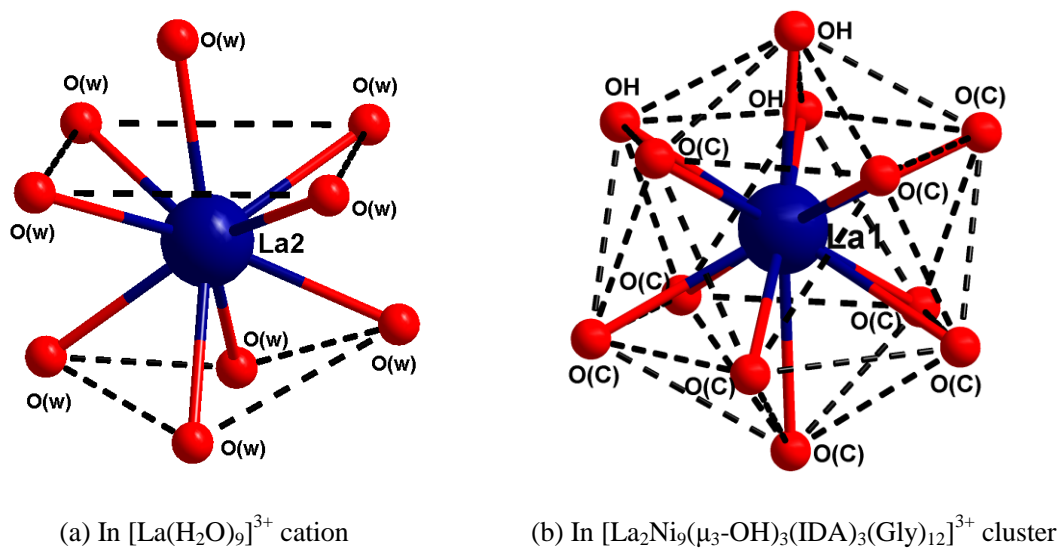

**Figure S1.** The coordination environments of the  $\text{La}^{3+}$  ions in **1**. O(C) means carboxylate oxygen.

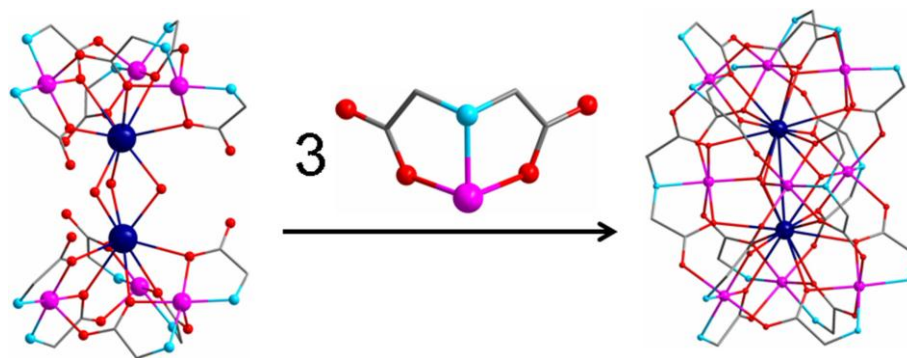

**Figure S2.** The possible assembly mechanism of the  $[\text{La}_2\text{Ni}_9(\mu_3\text{-OH})_3(\text{IDA})_3(\text{Gly})_{12}]^{3+}$  cationic cluster of **1** from  $\{\text{La}_2\text{Ni}_6\}$  and  $\{\text{NiIDA}\}$  units.

Reference:

[1] Hosoi, A.; Yukawa, Y.; Igarashi, S.; Teat, S. J.; Roubeau, O.; Evangelisti, M.; Cremades, W.; Ruiz, E.; Barrios, L. A.; Arom G. *Chem. Eur. J.* **2011**, *17*, 8264.

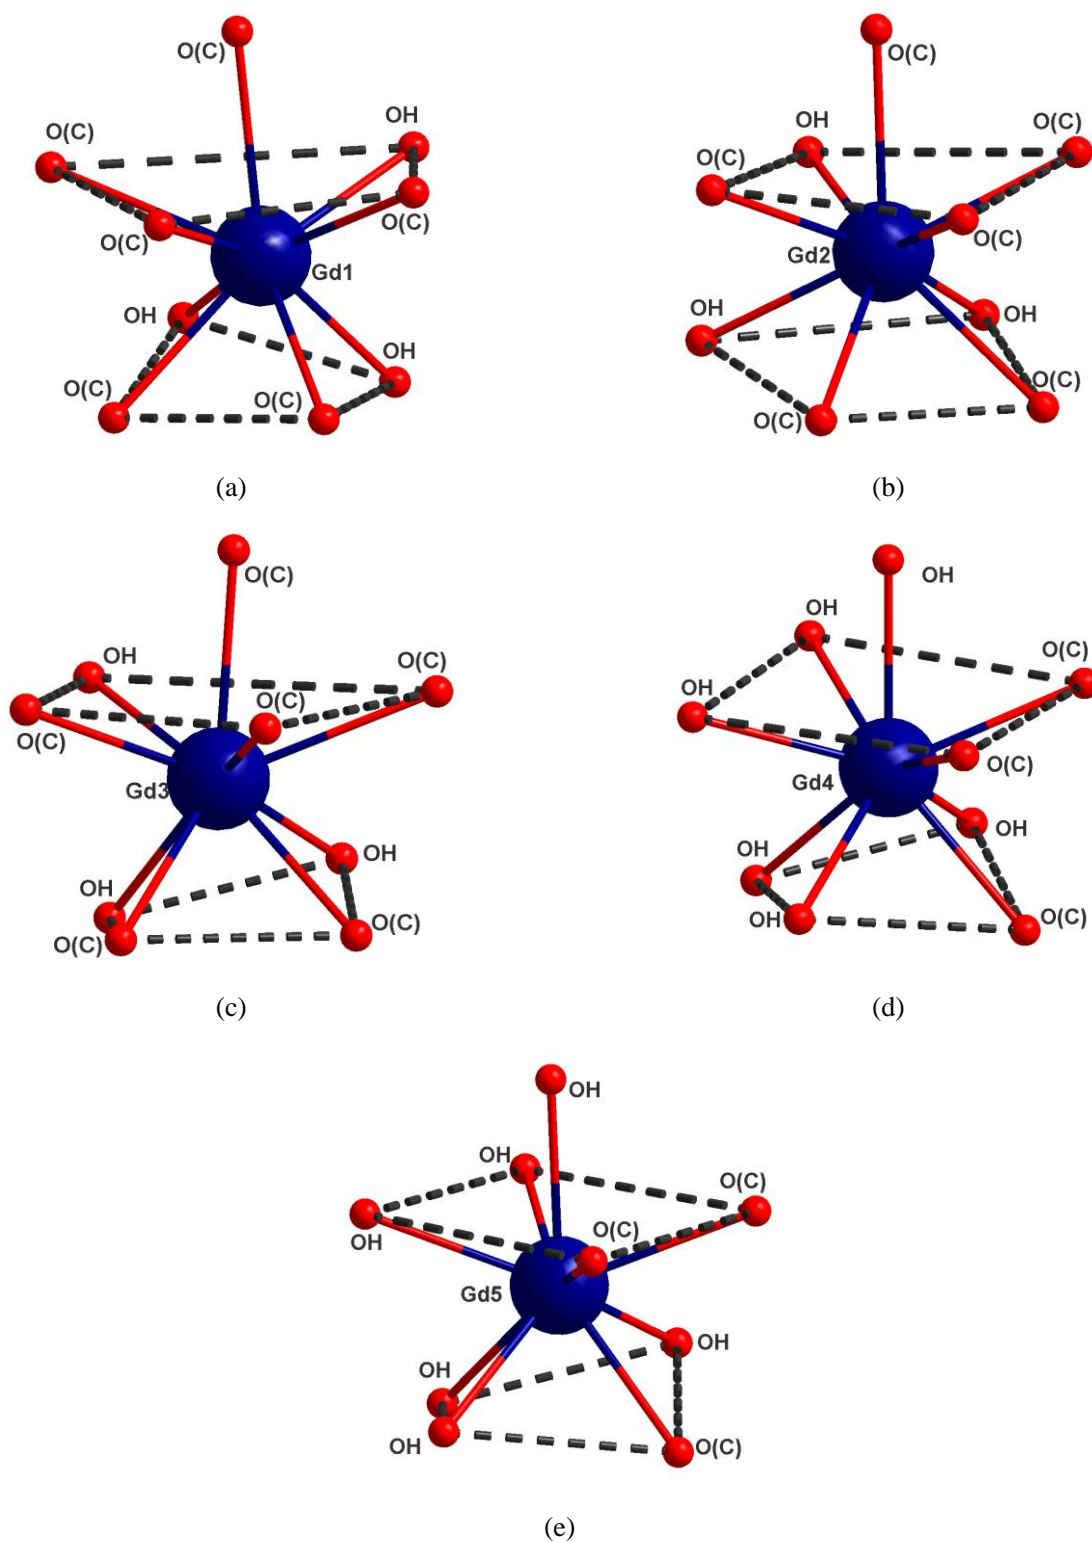

**Figure S3.** The coordination environments of the  $\text{Gd}^{3+}$  ions in **2**. O(C) means carboxylate oxygen.



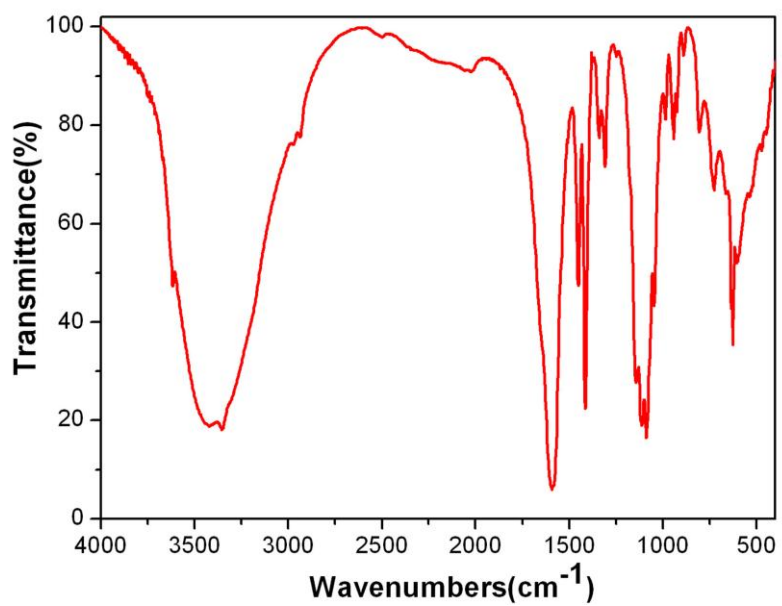

**Figure S4.** The IR spectrum of **1**.

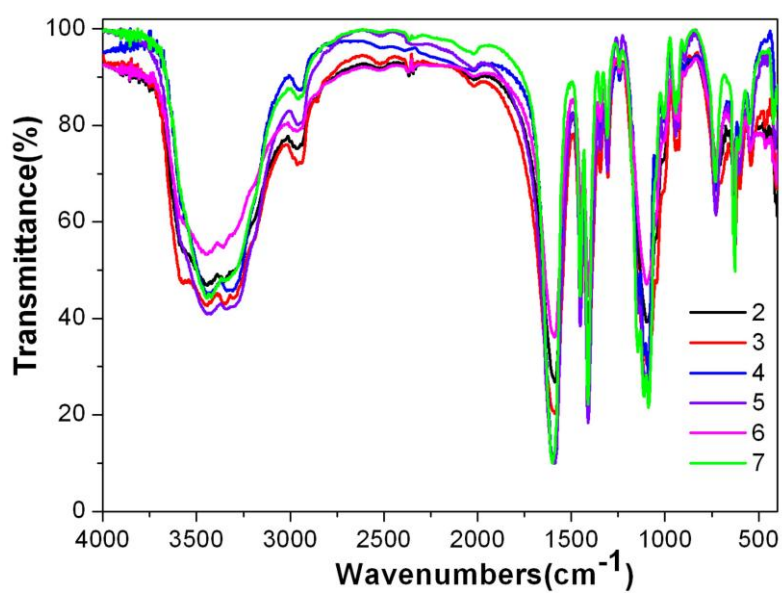

**Figure S5.** The IR spectra of **2-7**.



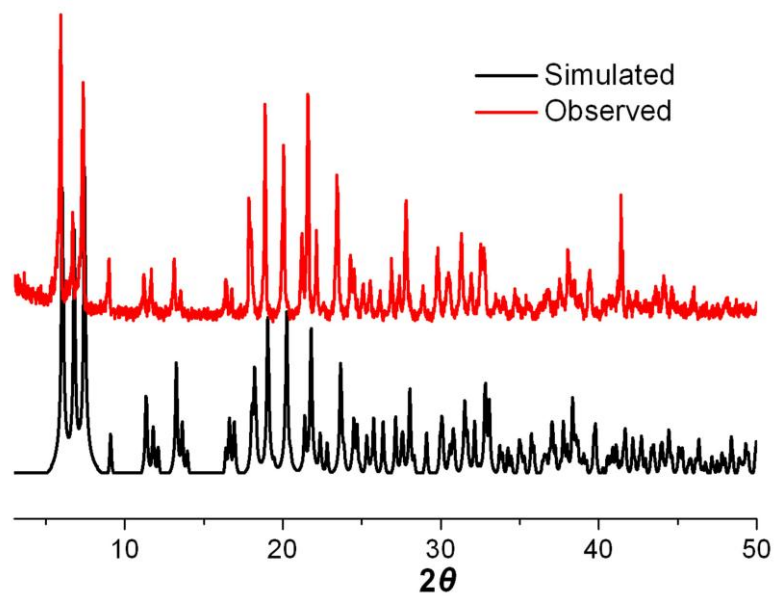

**Figure S6.** Powder X-ray diffraction patterns of **1**.

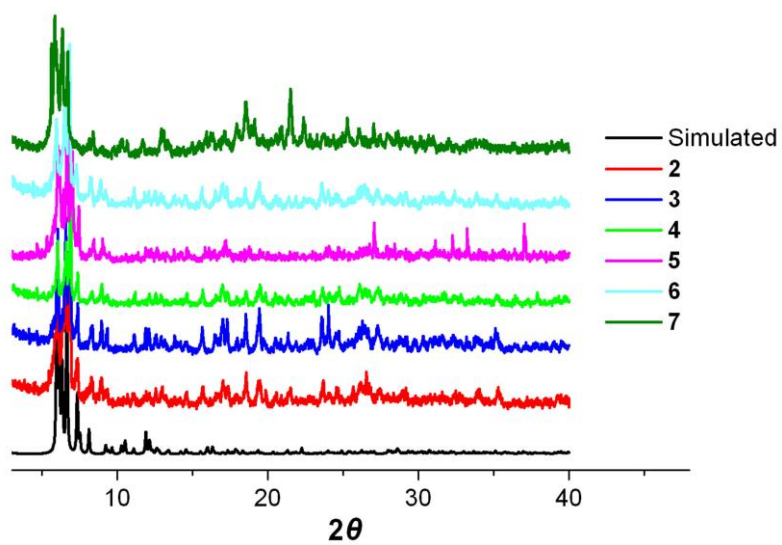

**Figure S7.** Powder X-ray diffraction patterns of **2-7**.

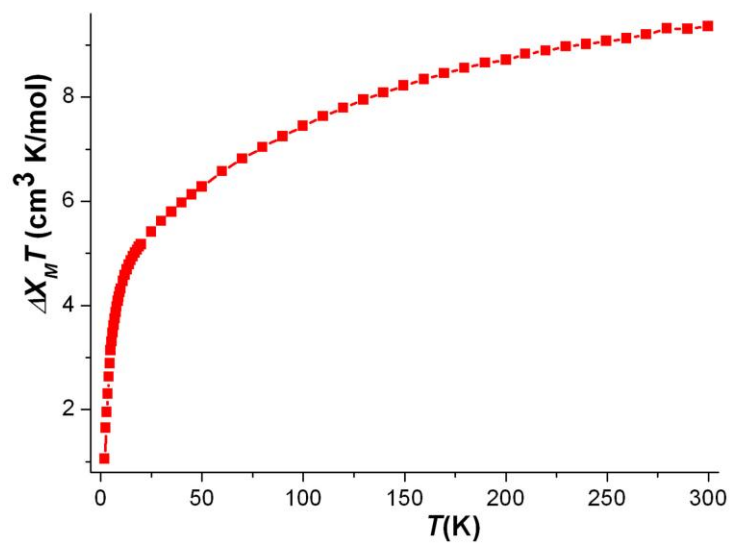

**Figure S8.** The plot of  $\Delta\chi_M T$ (3-7) versus  $T$ .

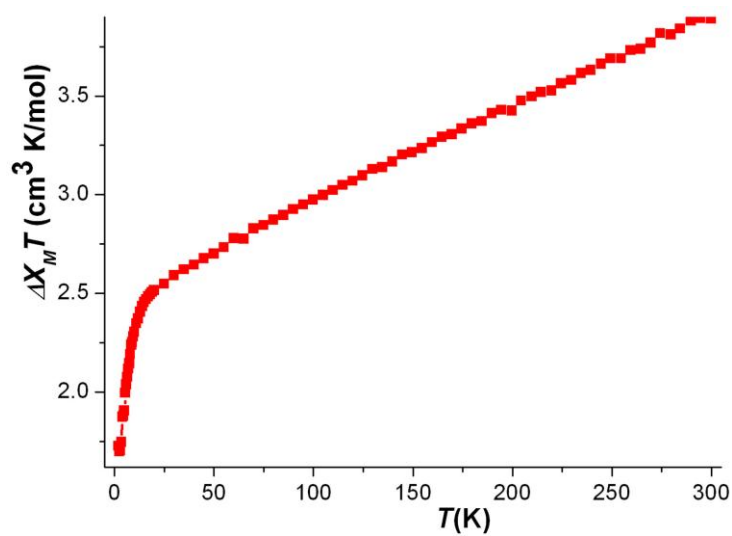

**Figure S9.** The plot of  $\Delta\chi_M T$ (4-7) versus  $T$ .

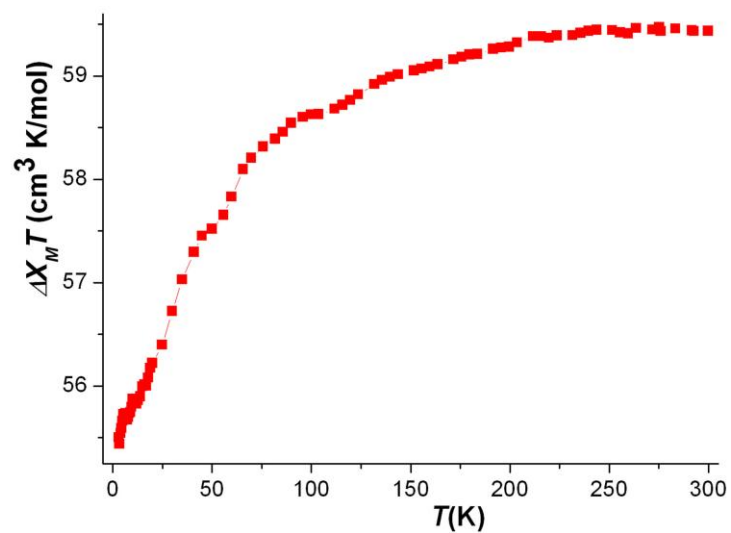

**Figure S10.** The plot of  $\Delta\chi_M T(5-7)$  versus  $T$ .

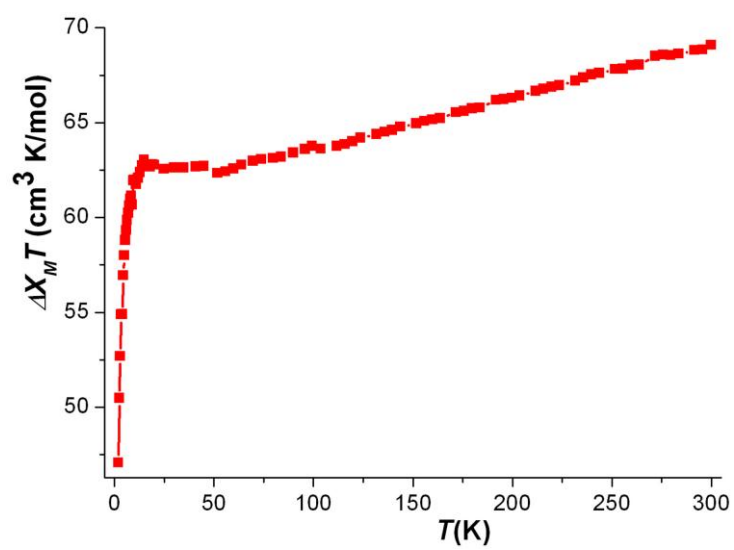

**Figure S11.** The plot of  $\Delta\chi_M T(6-7)$  versus  $T$ .

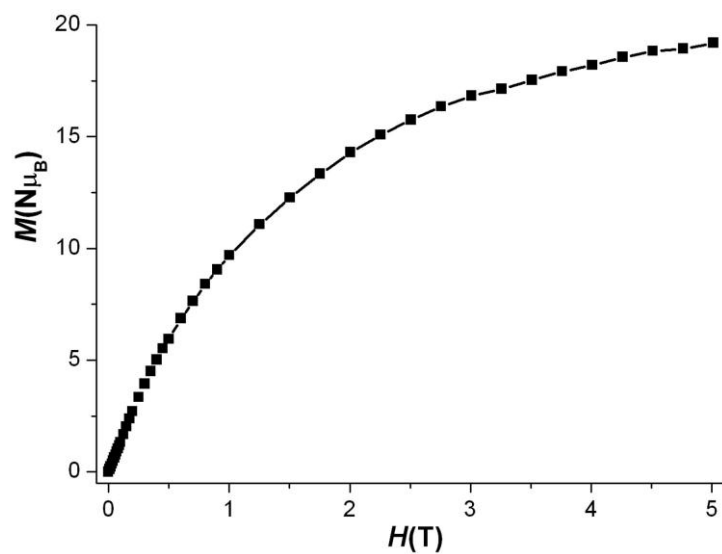

**Figure S12.** The field-dependent experimental magnetization plot at 2 K for **1**.

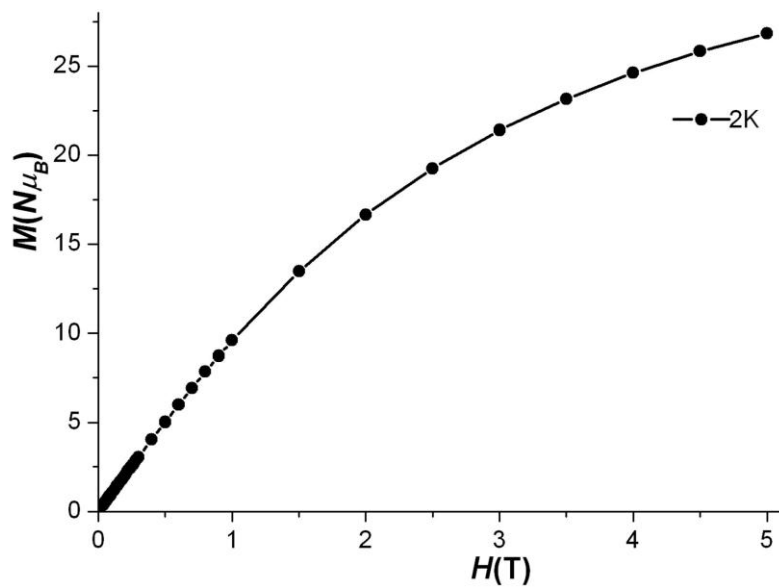

**Figure S13.** The field-dependent experimental magnetization plot at 2 K for **3**.

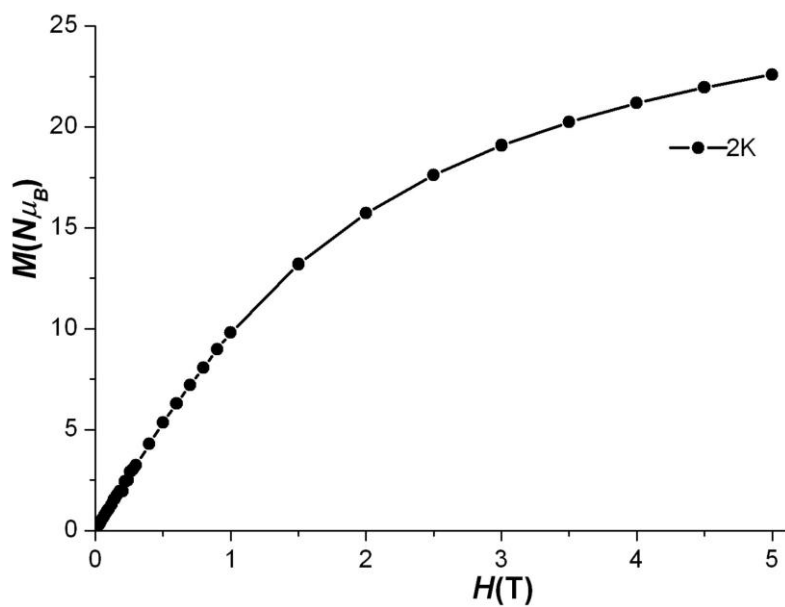

**Figure S14.** The field-dependent experimental magnetization plot at 2 K for **4**.

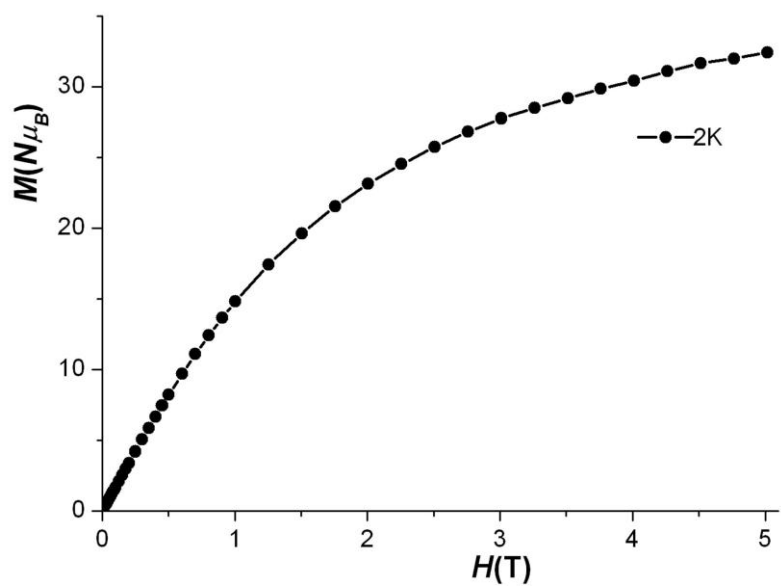

**Figure S15.** The field-dependent experimental magnetization plot at 2 K for **6**.

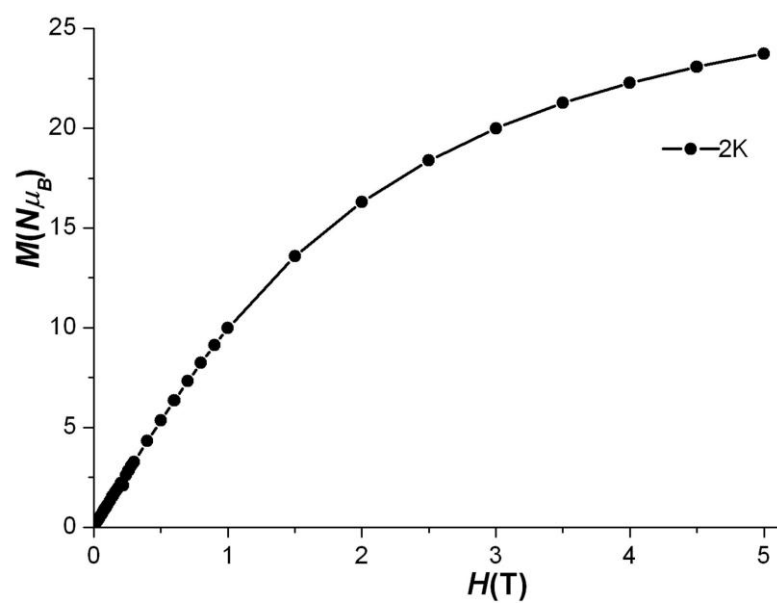

**Figure S16.** The field-dependent experimental magnetization plot at 2 K for 7.
